# Supplementary material for: Superiority of Bacillus velezensis and Glutamicibacter nicotianae as native non- rhizobial nodulating bacteria for enhancing legume production in low-fertility soils
Source: Research Square preprint supplement (doi:10.21203/rs.3.rs-7753496/v1), 2025-11-04
Supplement: Supplementary file 1 [file 1b44399462f66af403c79a08.docx]

**Supplementary material**

**Superiority of *Bacillus velezensis* and *Glutamicibacter nicotianae* as native non-rhizobial nodulating bacteria for enhancing legume production in low-fertility soils.**

**Marcelin Bahdjolbe1,2, Alain-Martial Sontsa-Donhoung3, Abdouraman Hawaou 1,2, Simon Thierry Okiobe4* and Dieudonne Nwaga1***

1 Soil Microbiology Laboratory, Biotechnology Center, Faculty of Sciences, University of Yaounde I, PO Box 812 Yaounde, Cameroon

2 National Veterinary Laboratory, PO Box 503 Garoua, Cameroon

3Laboratory of Regional Biological Control and Applied Microbiology, Institute of Agricultural Research for Development (IRAD), PO Box 2123 Yaounde, Cameroon

4 Department of Technology Assessment, Leibniz Institute for Agricultural Engineering and Bioeconomy (ATB), Potsdam, Germany

* Corresponding author email: [*dnwaga@yahoo.fr*](mailto:dnwaga@yahoo.fr)*,* [*sokiobe@atb-potsdam.de*](mailto:sokiobe@atb-potsdam.de)

Table S1. Significance levels of treatments compared to control for plant growth parameters in greenhouse experiment with *P* adjusted values. For all analyses, significance levels were denoted as follows:

p < 0.05 (*), p < 0.01 (**), p < 0.001 (***), and p < 0.0001 (****).

| **Treatments** | **Plant height** | **Number of leaves** | **Foliar surface** | **Number of pods** |
| --- | --- | --- | --- | --- |
| Control | – | – | – | – |
| VUID1 | * | ns | ns | ns |
| Aba4 | *** | ns | ns | ns |
| Aba5 | ns | ns | ns | ns |
| Nks5 | ** | ** | ns | ** |
| Nks4 | ns | ns | ns | ns |
| Nka11 | **** | **** | * | **** |
| Nka10 | ns | ns | ns | ** |
| Nga2 | **** | ns | ns | ns |
| Nga6 | **** | ns | ns | ns |

Table S2. Significance levels of treatments compared to control for plant growth parameters and yield in greenhouse experiment with *P* adjusted values. For all analyses, significance levels were denoted as follows: p < 0.05 (*), p < 0.01 (**), p < 0.001 (***), and p < 0.0001 (****).

| **Treatments** | **Pod Biomass** | **Plant Biomass** | **Grain Yield** |
| --- | --- | --- | --- |
| Control | – | – | – |
| VUID1 | ns | ** | * |
| Aba4 | ns | **** | ns |
| Aba5 | ns | *** | ns |
| Nks5 | *** | *** | **** |
| Nks4 | ns | **** | ns |
| Nka11 | **** | **** | **** |
| Nka10 | ns | * | ns |
| Nga2 | ns | **** | ns |
| Nga6 | * | **** | ** |

| **Parameters** | **Intercept (Control)** | **Rhizo Effect (vs. Control)** | **NRE+Rhizobia Effect (vs. Control)** | **F-values** | **p-values** |
| --- | --- | --- | --- | --- | --- |
| Root nodules | 9.56 ± 0.74 | +12.33 ± 0.31 (*** ) | +9.90 ± 0.31 (*** ) | 896.0 | < 2.2e-16 *** |
| Nodule biomass | 1.32 ± 0.22 | +0.71 ± 0.05 (*** ) | +0.75 ± 0.05 (*** ) | 143.7 | < 2.2e-16 *** |
| Plant biomass | 37.78 ± 1.41 | +16.67 ± 0.75 (*** ) | +27.67 ± 0.75 (*** ) | 686.4 | < 2.2e-16 *** |
| Plant height | 40.21 ± 5.26 | +4.41 ± 0.71 (*** ) | +9.87 ± 0.71 (*** ) | 97.2 | < 2.2e-16 *** |
| Grain yield | 1.63 ± 0.14 | +1.33 ± 0.20 (*** ) | +0.67 ± 0.20 (** ) | 21.9 | 2.9e-08 *** |

Table S3. Summary of mixed-effects model results (fixed effects estimates) for cowpea growth parameters and yield in the field trial.

Treatments: Control, non-rhizobial endophytes (NREs), and NRE+Rhizobia treatments.

For all analyses, significance levels were denoted as follows: p < 0.05 (*), p < 0.01 (**), p < 0.001 (***), and p < 0.0001 (****).

Table S4. Characteristics of the soil used in the field experiment. The soil pH was weakly acidic and the organic carbon content was low, in accordance with the rates of organic carbon assessment of the soil. Total nitrogen was 0.14%, this indicates an average capacity to provide available nitrogen which is a key nutrient for crop growth and health. and the level of available phosphorus was low in the soil (table 2). The levels of calcium and magnésium as for them also remain low, in accordance with the appreciation rate of these nutrients, while the level of available potassium in soil was high.

| Soil Parameters | | Soil Analysis |
| --- | --- | --- |
| pH water | | 6.23 |
| OC (%) | | 1.92 |
| OM (%) | | 3.31 |
| Total N (%) | | 0.14 |
| Available P (mg/kg) | | 6.50 |
| C/N | | 6.50 |
| Exchangeables cations meq/100g | Ca | 2.40 |
| Mg | 0.80 |
| K | 0.71 |
| Na | 0.05 |
| Soil texture (%) | Sand | 52 |
| Silt | 17 |
| Clay | 21 |
| Soil type | | Loamy |

**Nka11**

**Nka10**

**Nks5**

**Nks4**

**Aba4**

**Aba5**

**Control**

**VUID1**

**Nga2**

**Nga6**

Figure S1A: Greenhouse experimental design. The main factor was the cowpea variety, and the secondary factor included ten treatments replicated eight times: VUID1, Aba4, Aba5, Nks4, Nks5, Nka10, Nka11, Nga2, Nga6, and an uninoculated control. Each treatment consisted of eight individual plants with a total of 80 plants across all treatments.


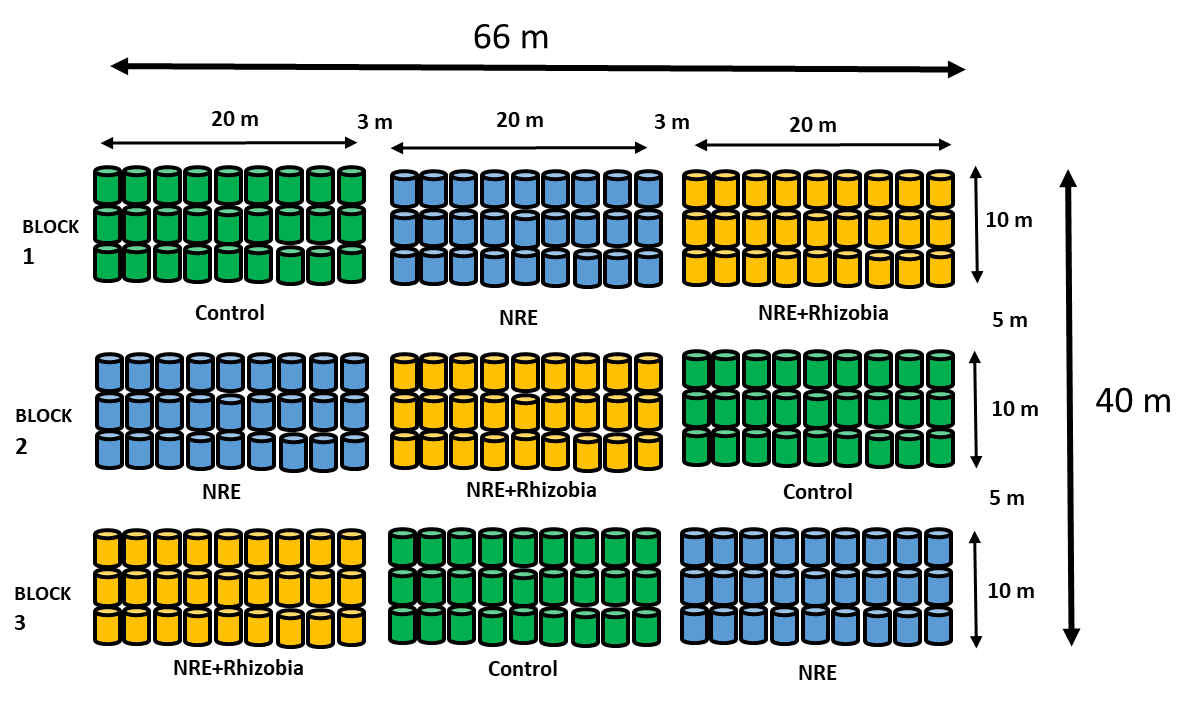


Figure S1B: The field trial followed a randomized complete block design to test three inoculation treatments on soybean: (i) Control (no inoculation), (ii) NRE (non-rhizobial endophyte consortium: *Glutamicibacter nicotianae* Nks5 + *Bacillus velezensis* Nka11), and (iii) NRE + Rhizobia (reference rhizobium strain VUID1). The site (≈66 m × 40 m) was arranged in three blocks. Each block contained three plots (20 m × 10 m) separated by 3 m alleys within blocks and 5 m alleys between blocks. Within every plot, 27 seed subplots were established in a 3 × 9 grid, and one subpot represented one soybean plant. Treatments were randomly assigned to plots within each block (one plot per treatment per block), giving 3 replicated lines per treatment. In total, 243 individual plants were grown (3 blocks × 3 plots per block × 27 plants per plot).


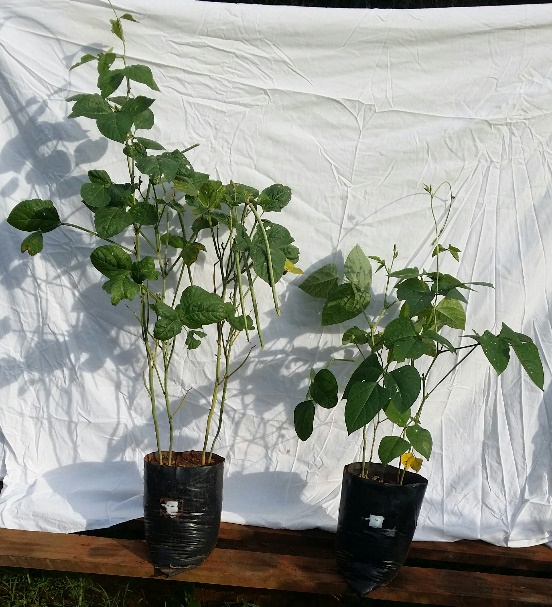


Figure S2: Effect of LNB isolate on cowpea growth parameters after sowing in pots. To: control without ioculation, Nka11 : inoculated plant with *Bacillus velezensis*

**T0**

**Nka11**


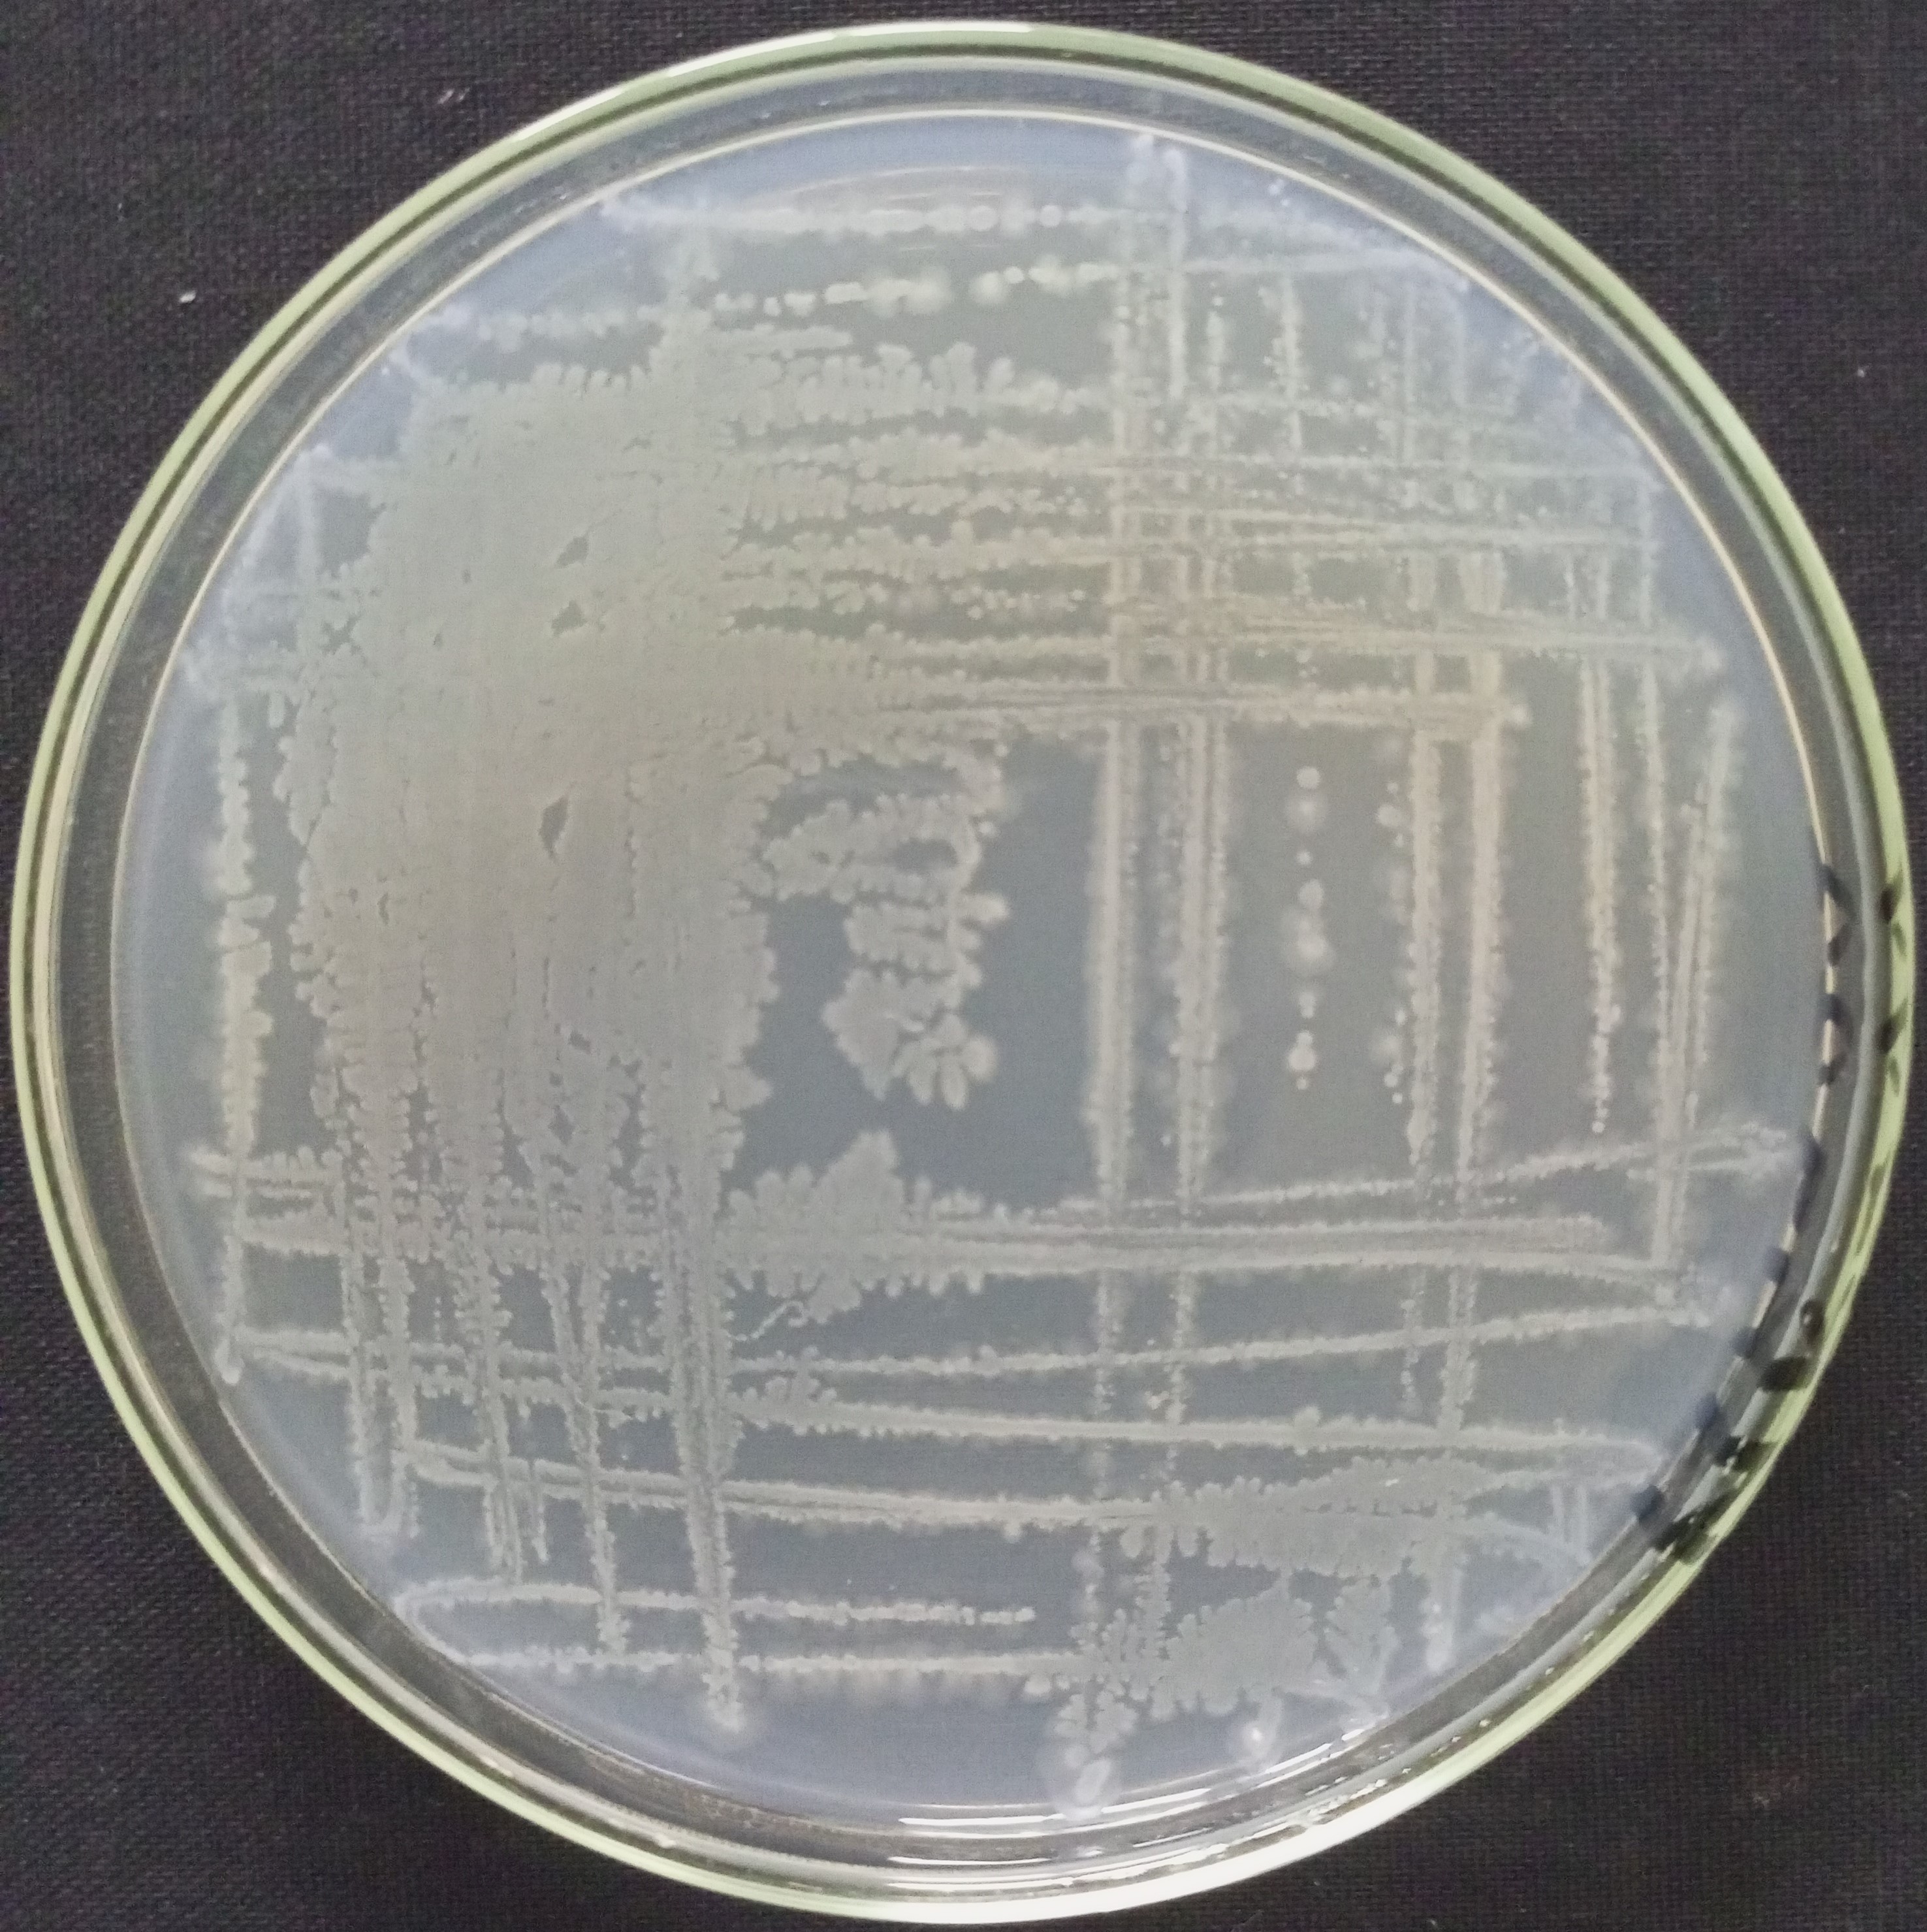


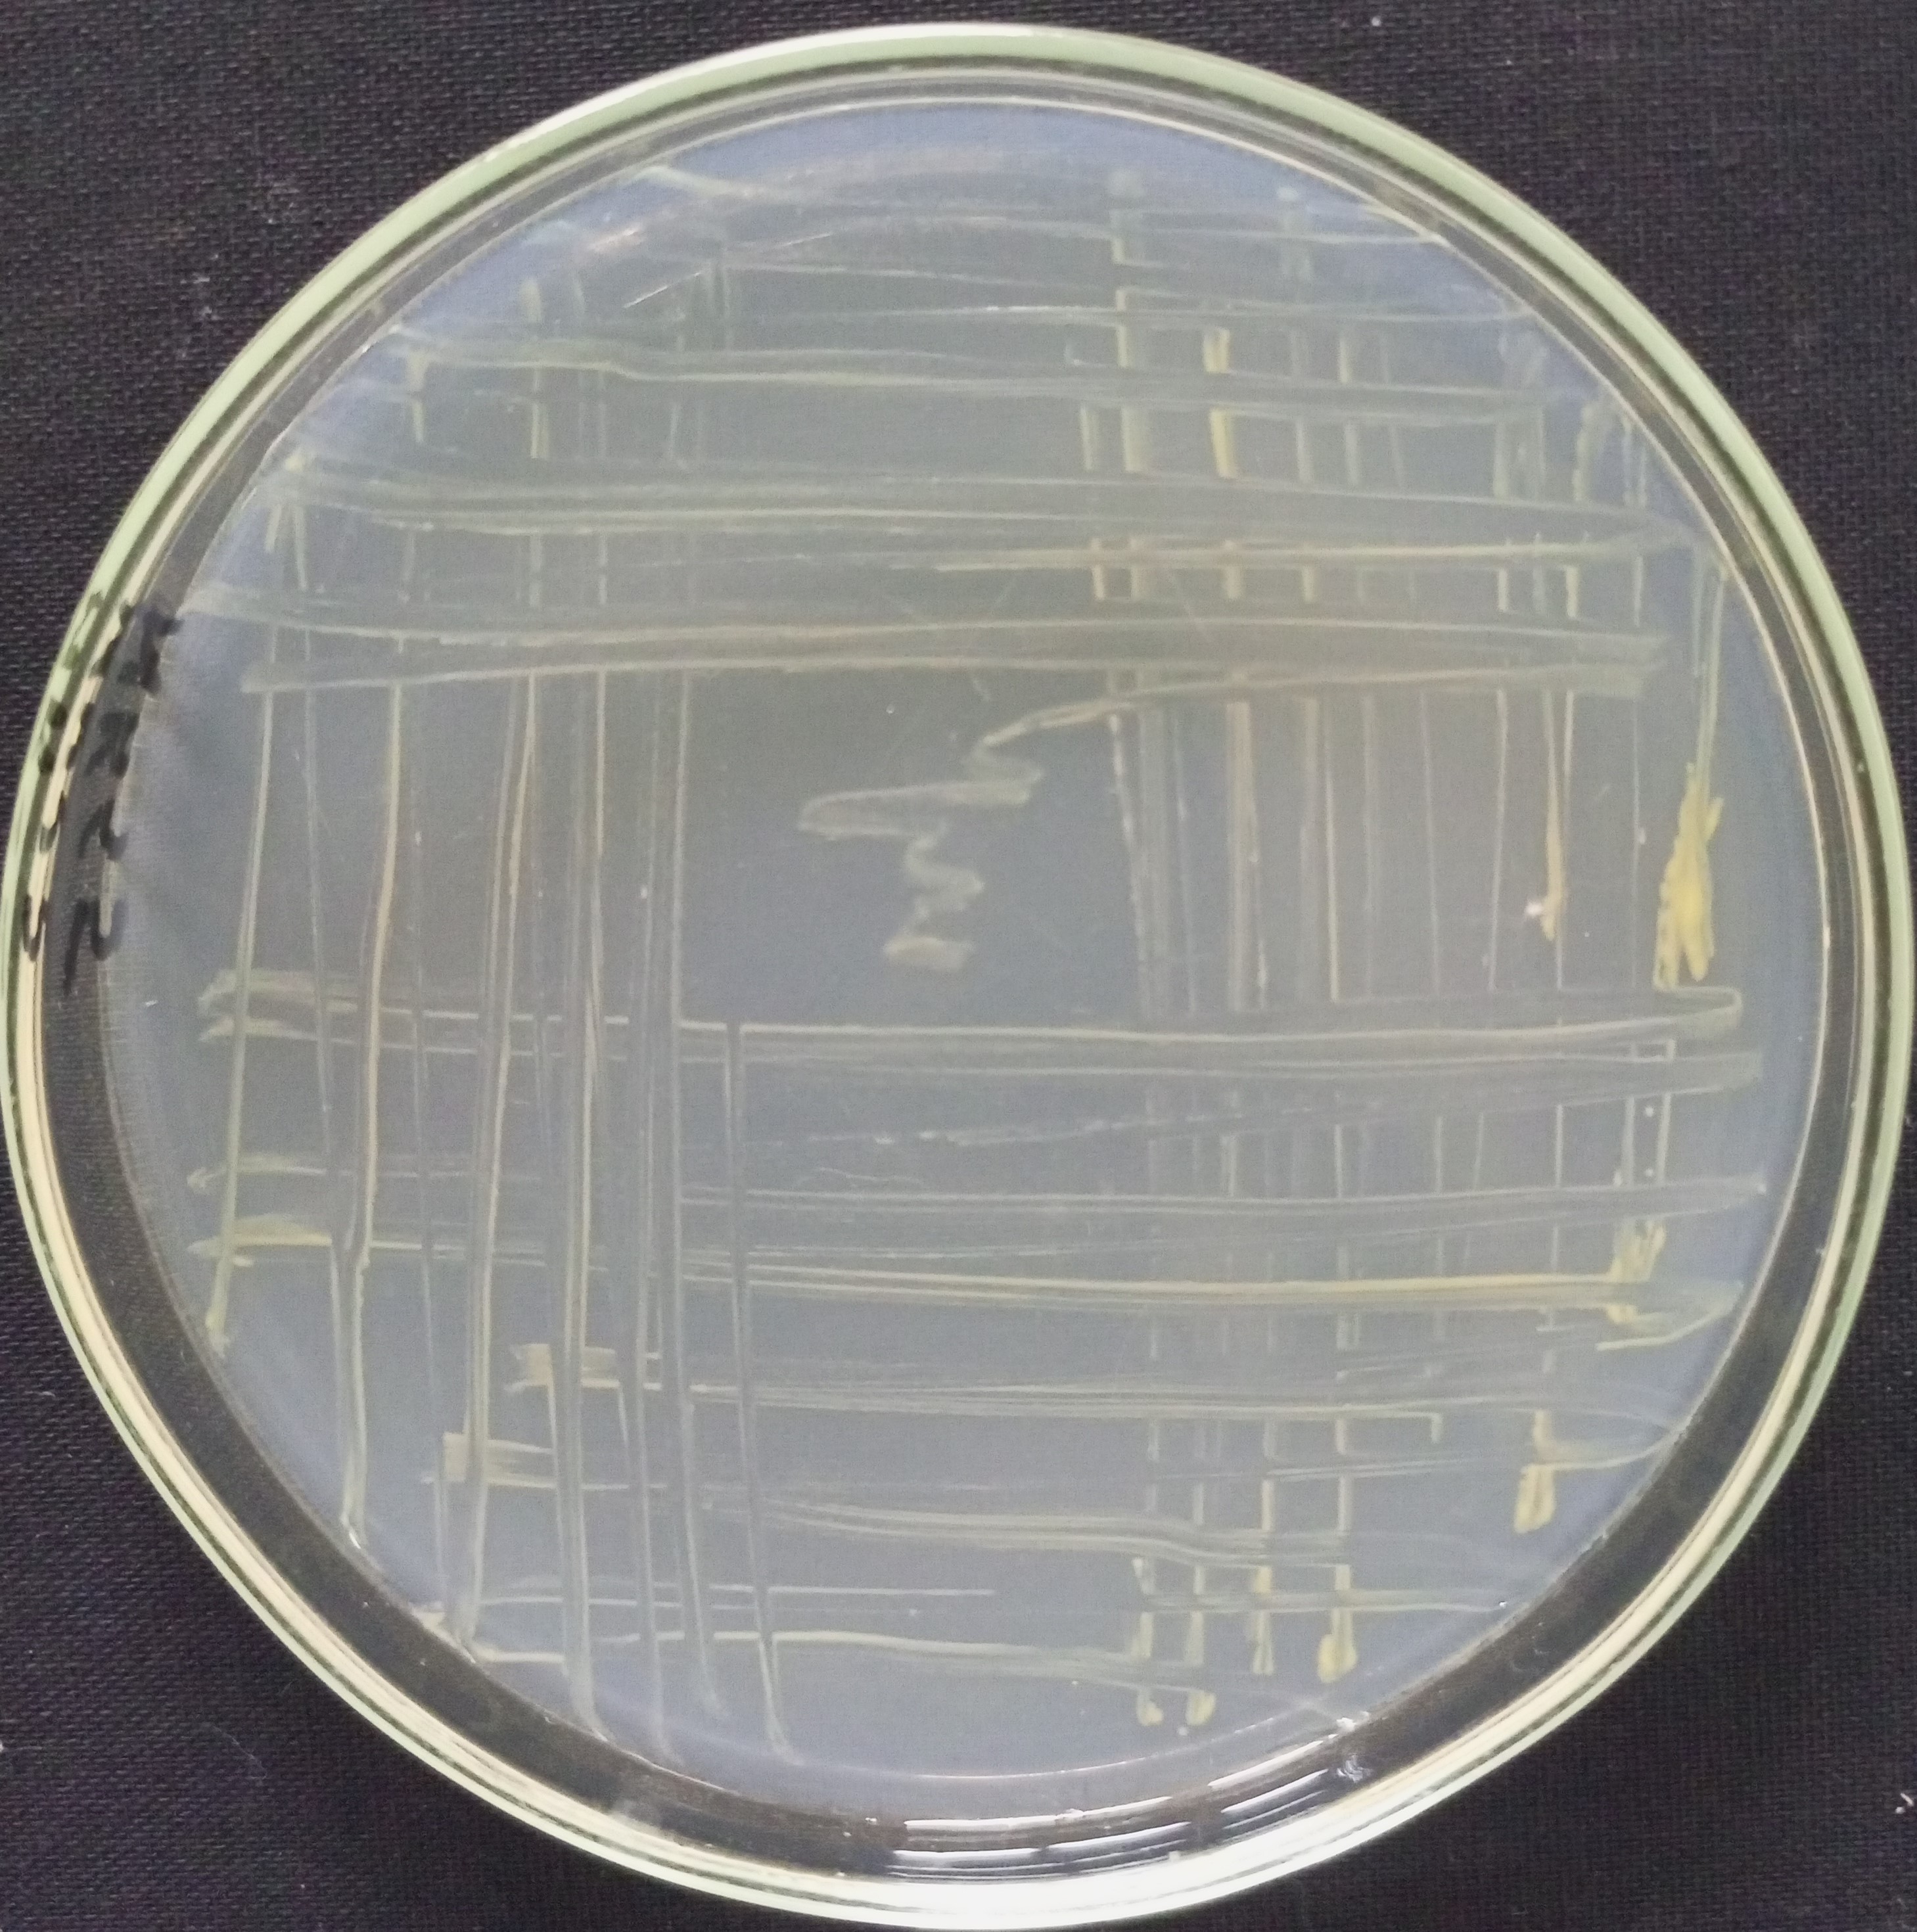


Nka11

Nks5


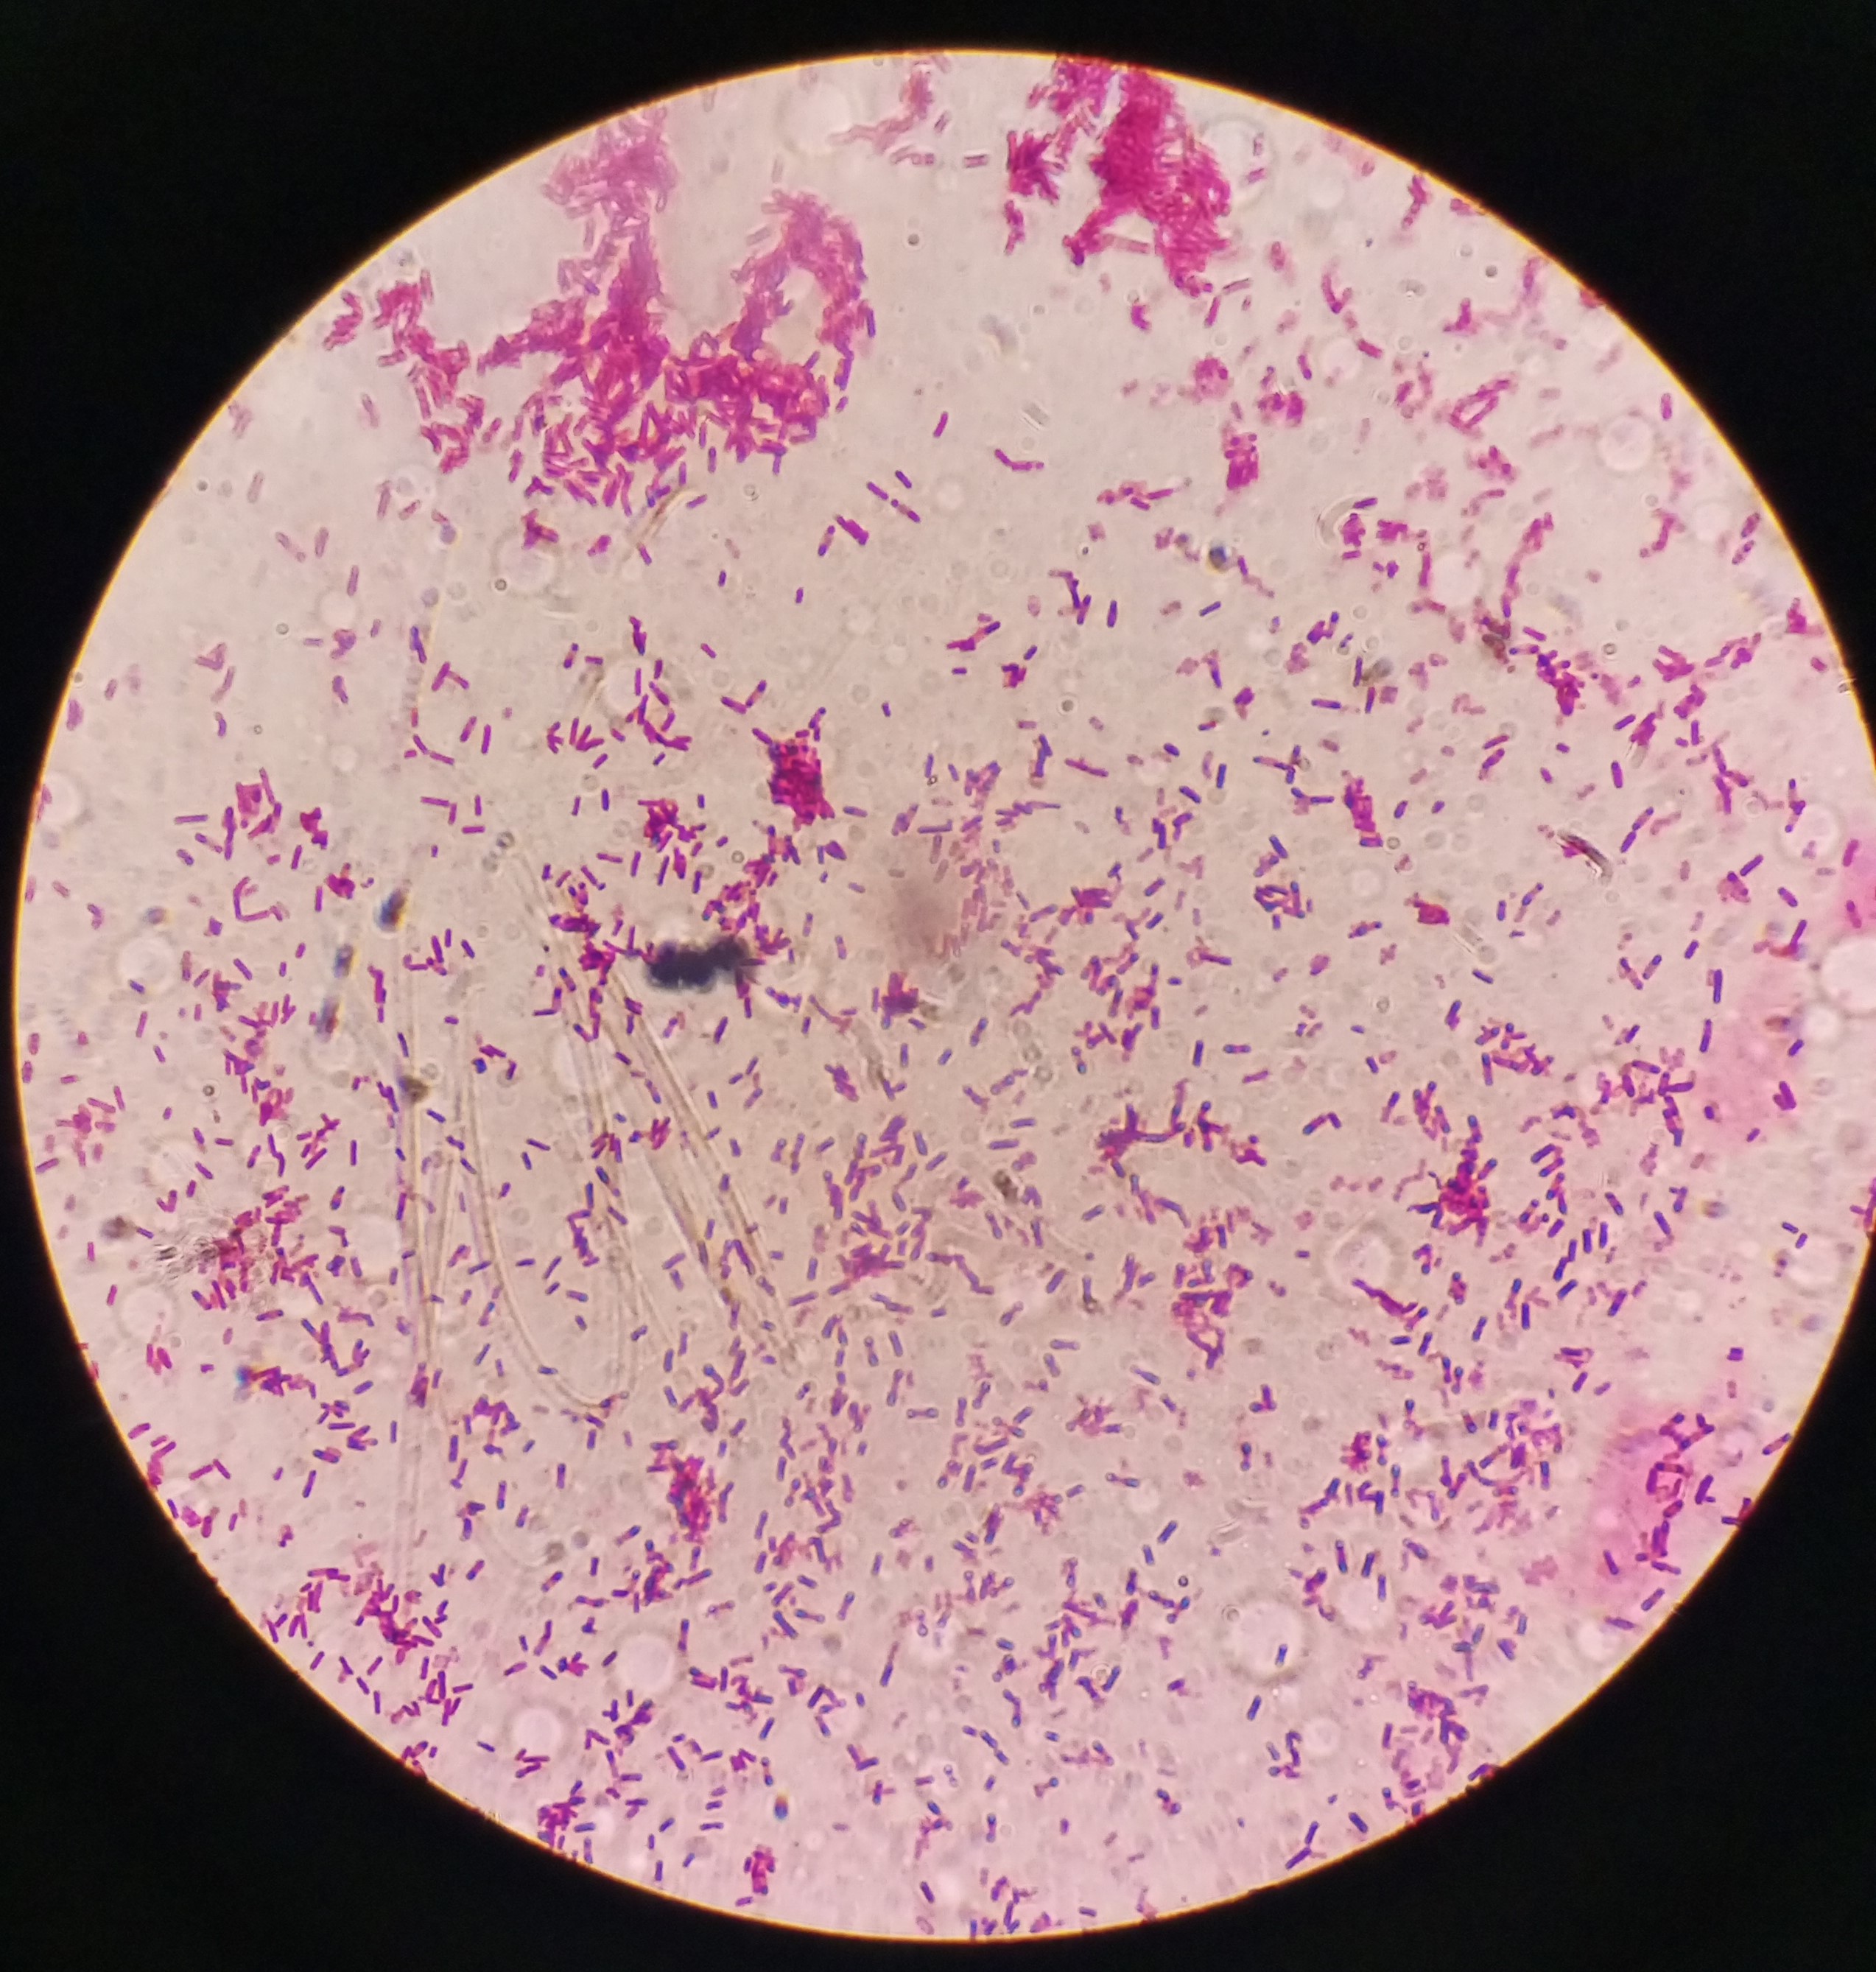


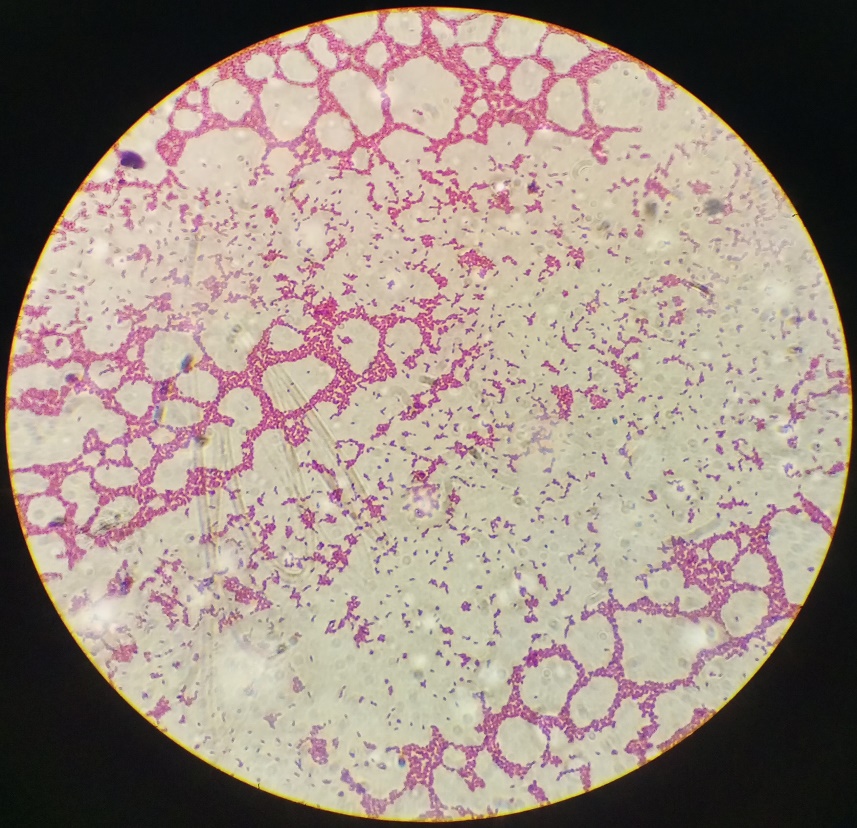


Figure S3: NRE isolates.

Nka11

Nks5

Figure 3: Non-rhizobial endophyte strains.
